# Supplementary material
Source: PubMed Central journal article supplement (PMC7500487)
Supplement: NIHMS1530628-supplement-supplementary.pdf [file NIHMS1530628-supplement-supplementary.pdf]

## Supplementary

TABLE 1. Performance of each CNN model measured by AUC using 5-folds cross-validation.

| Comparison Method               | Training Method | Small Input Size | Middle Input Size | Large Input Size | Fusion      |
|---------------------------------|-----------------|------------------|-------------------|------------------|-------------|
| 2D slice image transverse plane | scratch         | 0.715±0.036      | 0.718±0.047       | 0.664±0.051      | 0.737±0.042 |
|                                 | fine-tune       | 0.743±0.048      | 0.722±0.034       | 0.674±0.055      | 0.769±0.043 |
| 2D slice image multi-view plane | scratch         | 0.723±0.026      | 0.702±0.043       | 0.610±0.033      | 0.753±0.037 |
|                                 | fine-tune       | 0.798±0.030      | 0.820±0.021       | 0.824±0.016      | 0.846±0.021 |
| 3D volume image                 | scratch         | 0.776±0.030      | 0.782±0.041       | 0.763±0.017      | 0.817±0.023 |
